# Supplementary material for: Extracellular signal-regulated kinase 1/2 is required for complement component C1q and fibronectin dependent enhancement of Fcγ- receptor mediated phagocytosis in mouse and human cells
Source: Springer Nature journal article supplement (doi:10.1186/s12865-020-00393-6), 2020-12-01

**Supplemental figures for:**

**Extracellular signal-regulated kinase 1/2 is required for complement component C1q and fibronectin dependent enhancement of Fc $\gamma$ - receptor mediated phagocytosis in mouse and human cells**

<sup>1</sup>Willmann, Emily A., <sup>1</sup>Pandurovic, Vesna, <sup>1</sup>Jokinen, Anna, <sup>1</sup>Beckley, Danielle, and <sup>2\*</sup>Bohlson, Suzanne S. <sup>1</sup>Department of Microbiology and Immunology, Des Moines University, IA, USA

<sup>2</sup>Department of Molecular Biology and Biochemistry, University of California, Irvine, CA, USA.

# Figure Legends

**Supplemental Figure 1. Alteration in ERK1/2 phosphorylation by C1q was detected from a phospho-kinase array.** BMDM were adhered to 4 $\mu$ g/mL HSA (control) or C1q for 30 min, then incubated with BSA-anti-BSA immune complexes (IC) for an additional 0 min or 5 min. After the indicated time, cells were lysed and phosphorylation of 43 different proteins in duplicate were detected by the phospho-kinase array and analyzed using ImageJ. (A) Image of the phospho-kinase array with p-ERK1/2 circled in black. (B) Quantification of p-ERK1/2 from the array in (A). Bars represent the average of the duplicate samples.

**Supplementary Figure 2.** Uncropped full-length blots are included for figures 3 (A and B), 5 (C) and 6 (D). The area that is cropped is indicated by the dashed box.

**A.**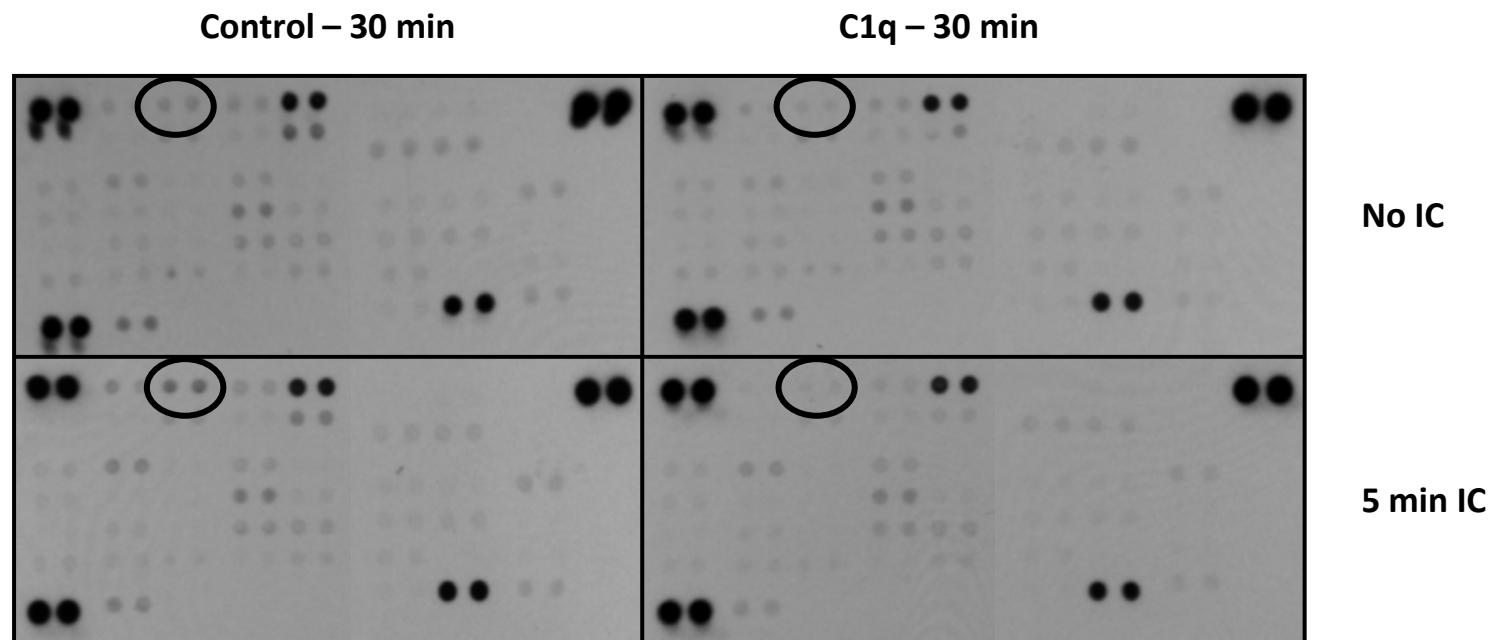**B.**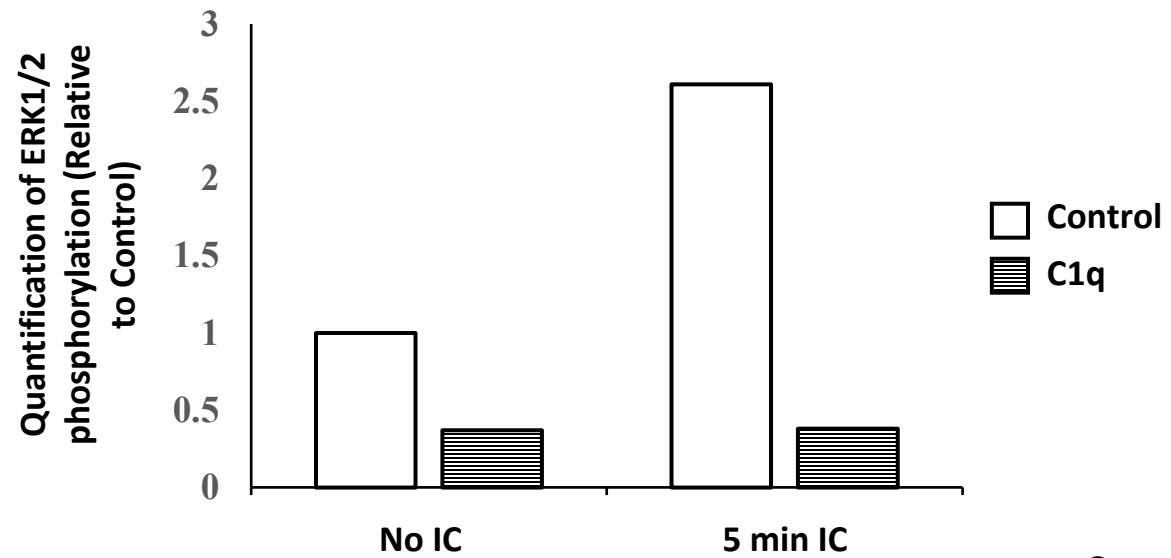

A

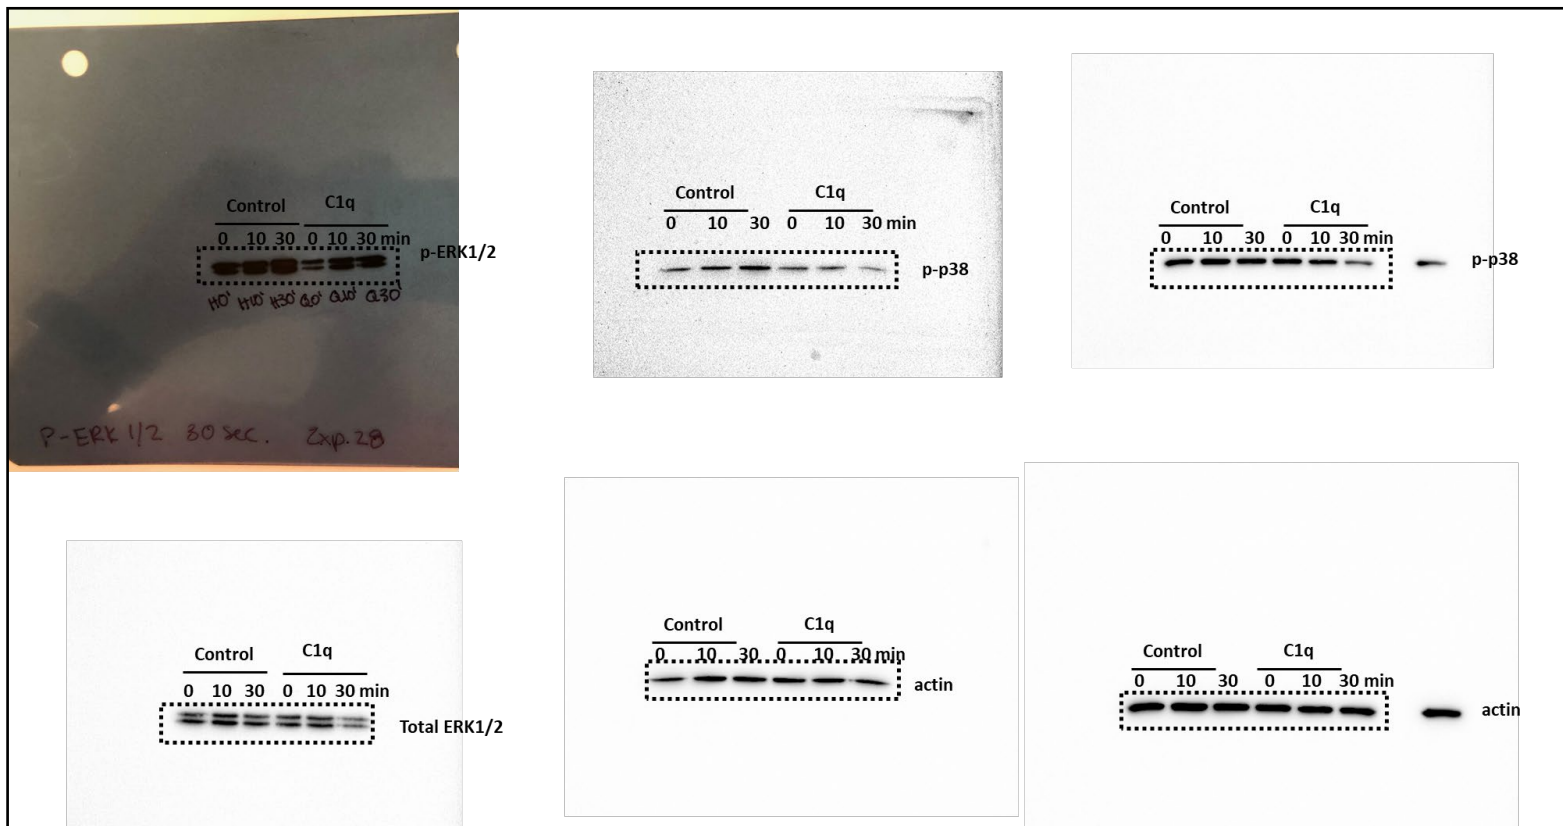

C

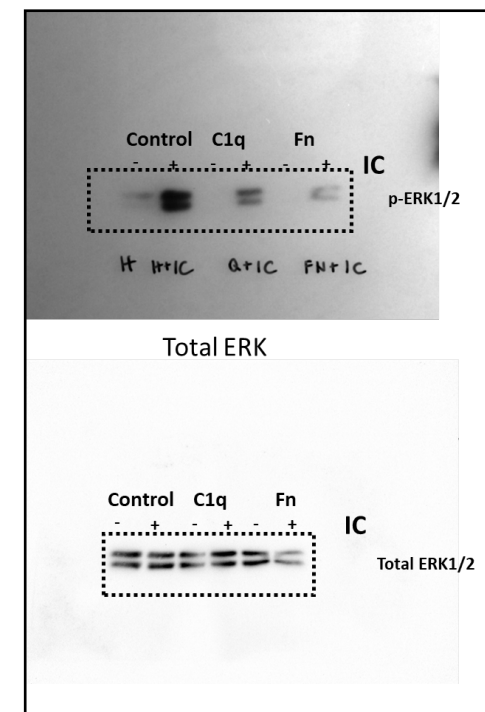

B

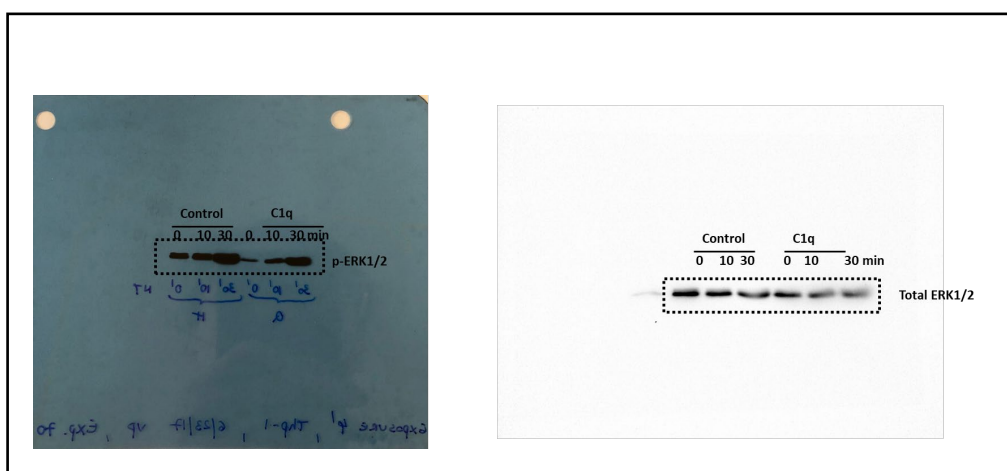

D

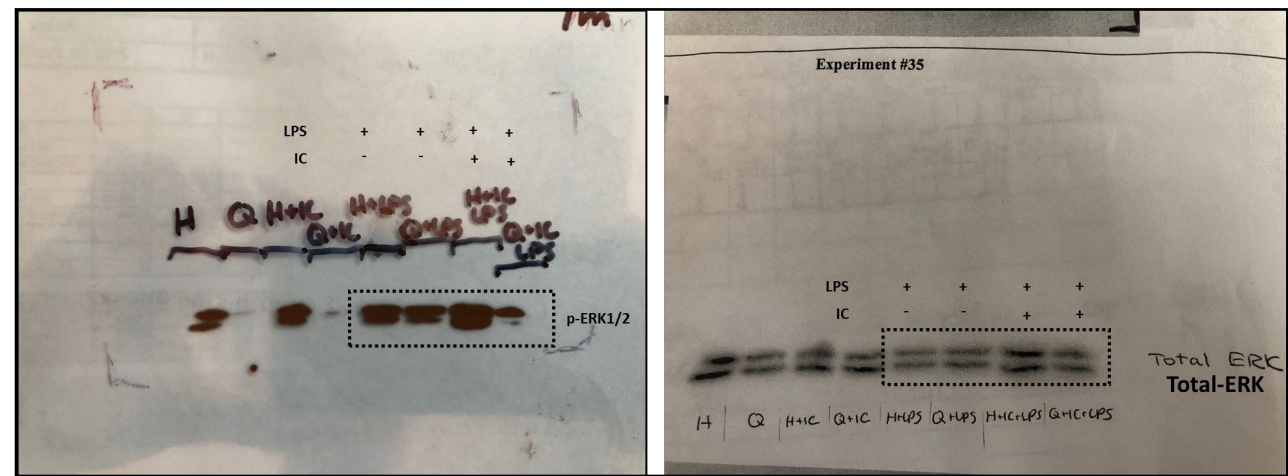

Supplement: MOESM1 [file 18681716]
